# Supplementary material
Source: PubMed Central journal article supplement (PMC6295855)
Supplement: ml8b00420_si_001.pdf [file ml8b00420_si_001.pdf]

# Fluorescent competition assay for retinoic acid binding proteins

## Supplementary Information

Charles W.E. Tomlinson<sup>1</sup>, David Chisholm<sup>1</sup>, Roy Valentine<sup>2</sup>, Andrew Whiting<sup>1</sup>, Ehmke Pohl<sup>1,3\*</sup>

1. Department of Chemistry, Durham University, Science Laboratories, South Road, Durham, DH1 3LE.

2. High Force Research Ltd. Bowburn North Industrial Estate, Bowburn, Durham, DH6 5PF.

3. Department of Biosciences, Durham University, Science Laboratories, South Road, Durham, DH1 3LE.

**KEYWORDS:** *Retinoids, Fluorescence, ATRA, high-throughput screening*

### EXPERIMENTAL PROCEDURES

#### CRABP-II Expression

CRABP-II protein was prepared from BL21 cells transformed with a pGEX 4T1 vector, generated as 25 ml starter cultures (25 g/L lysogeny broth, 100 µg/ml ampicillin) and transferred to 1 L expression cultures after overnight incubation at 37 °C. Expression was induced after 4 hr shaking (37 °C, 150 rpm) using IPTG (1 mM in culture), before a 20 hr overnight shake. The resulting cultures were spun down using an Avanti Hi-Speed centrifuge (JLA 8.1000, 4000 rpm, 25 min, 4 °C), before removal of supernatant and freezing of pellets at -80 °C.

#### CRABP-II Purification

Pellets were resuspended with 15 ml cold lysis buffer (10 mM DTT, 100 mM MgCl<sub>2</sub>, in PBS pH 7.5) and lysed with the addition of 0.5 mg/ml lysozyme for 30 min. The resulting suspension was sonicated on ice (40% power) and centrifuged (20,000 rpm, 50 min, 4 °C). The supernatant collected was loaded onto a GST column (1 ml, GE healthcare) and washed using 30 ml PBS pH 7.5. The column was then loaded with 1 ml thrombin (GE Healthcare) used to cleave the GST tag and reserved at room temperature for 16 hrs. The cleaved protein was eluted using 3 ml PBS pH 7.5, and bound GST tag was eluted using 5 ml reduced glutathione (10 mM). The resulting protein fractions were analysed by SDS PAGE and mass spectrometry, and concentration was estimated using Thermo Scientific Nanodrop A280.

#### CRABP-II Crystallisation

Purified CRABP-II (5 mg/ml) in PBS was combined with DC271 freshly dissolved in EtOH, in a 1:1 molar ratio. Crystallisation conditions were prepared from 0.2 µm filtered buffer and PEG stocks. Trays were loaded with 500 µL reservoir solution, and hanging drops prepared with varying protein: reservoir ratios. Hanging droplets were inspected under Leica microscope, and periodically reviewed for crystal formation.

#### Data Processing and structural determination

Data was collected at the Diamond light source on the I-03 beamline, equipped with a Pilatus Detector.<sup>1</sup>

Crystallography data for CRABP-II bound to DC271 was processed using the CCP4i2 suite of programs following successful auto processing by XIA2 (XDS)<sup>2,3</sup>. AIMLESS and POINTLESS<sup>4,5</sup> were used for scaling and data reduction. MR BUMP (PHASER)<sup>6,7</sup> was used to perform molecular replacement based on the 2FR3 structure of CRABP-II (PDB 2FR3), and to generate a protein structure. Manual building was performed using COOT<sup>8</sup>, and refinement carried out in REFMACS<sup>9</sup> using jelly-body refinement and adding anisotropic B-factors. Further details are summarised in Table 1.

#### CRABP-II assay validation

DC271 (300 nM in 1% EtOH) and CRABP-II (300 nM in 20 mM K<sub>2</sub>HPO<sub>4</sub>, 100 mM KCl, pH 7.4 + 0.05% Pluronic F127) solutions were prepared and mixed before use. A Corning, Black Non-binding Surface (NBS), 96 well plate was cleaned using compressed air and Maximum and Median wells were loaded with 60 µl CRABP-II/DC271 solution. Minimum wells were loaded with 60 µl control solution of DC271 mixed with assay buffer. Median wells were then loaded with 30 µl EC23 (600 nM in 1% EtOH), and Maximum and Minimum wells with 30 µl of a 1% EtOH solution. Plates were spun at 1700 rpm, 2 mins to ensure mixing. Plates were read using a Synergy H4 plate reader, at ex/em 355/460 nm. The total well volume is 90 µl, the on plate concentration of CRABP-II and DC271 is 100 nM.

## CRABPII competitive binding assay

DC271 (300 nM in 1% EtOH) and CRABPII (300 nM in 20 mM K<sub>2</sub>HPO<sub>4</sub>, 100 mM KCl, pH 7.4 + 0.05% Pluronic F127) solutions were prepared and mixed before use. A Corning, Black Non-binding Surface (NBS), 96 well plate was cleaned using compressed air and Maximum, Median and all test compound wells were loaded with 60  $\mu$ l CRABPII/DC271 solution. Minimum wells were loaded with 60  $\mu$ l control solution of DC271 mixed with assay buffer. Median wells were then loaded with 30  $\mu$ l EC23 (600 nM in 1% EtOH), and Maximum and Minimum wells with 30  $\mu$ l of a 1% EtOH solution. Test compounds were prepared as dilution series and applied to the plate as 30  $\mu$ l aliquots. Plates were spun at 1700 rpm, 2 mins to ensure mixing. Plates were read using a Synergy H4 plate reader, at ex/em 355/460 nm. The total well volume is 90  $\mu$ l, the on plate concentration of CRABPII and DC271 is 100 nM.

## CRYSTALLOGRAPHIC DATA

Table 1: Crystallographic statistics for DC271 CRABPII co-crystal structure

|                              | Overall     | Inner | Outer |
|------------------------------|-------------|-------|-------|
| Low resolution limit         | 40.52       | 40.52 | 1.53  |
| High resolution limit        | 1.50        | 8.22  | 1.5   |
| Rmerge(within I+/I-)         | 0.114       | 0.111 | 0.637 |
| Rmerge(all I+ and I-)        | 0.122       | 0.114 | 0.710 |
| Rmeas (within I+/I-)         | 0.136       | 0.133 | 0.803 |
| Rmeas (all I+ & I-)          | 0.134       | 0.126 | 0.792 |
| Rpim (within I+/I-)          | 0.073       | 0.072 | 0.484 |
| Rpim (all I+ & I-)           | 0.053       | 0.053 | 0.348 |
| Rmerge in top intensity bin  | 0.085       |       |       |
| Number of observations       | 172350      | 1081  | 6693  |
| Number unique                | 27224       | 211   | 1310  |
| Mean((I)/sd(I))              | 8.9         | 15.5  | 2.3   |
| Half-set correlation CC(1/2) | 0.991       | 0.990 | 0.778 |
| Completeness %               | 100.0       | 99.8  | 100.0 |
| Multiplicity                 | 6.3         | 5.1   | 5.1   |
| Anomalous completeness %     | 99.8        | 100.0 | 99.8  |
| Anomalous multiplicity       | 3.3         | 3.4   | 2.6   |
| Statistic                    |             |       |       |
| Resolution                   | 40.55-1.50  |       |       |
| No. reflections all/free     | 27170/1374  |       |       |
| R-factor/R-free              | 0.143/0.175 |       |       |
| R.M.S.D Bonds                | 0.0147      |       |       |
| RMSD Angles                  | 1.903       |       |       |

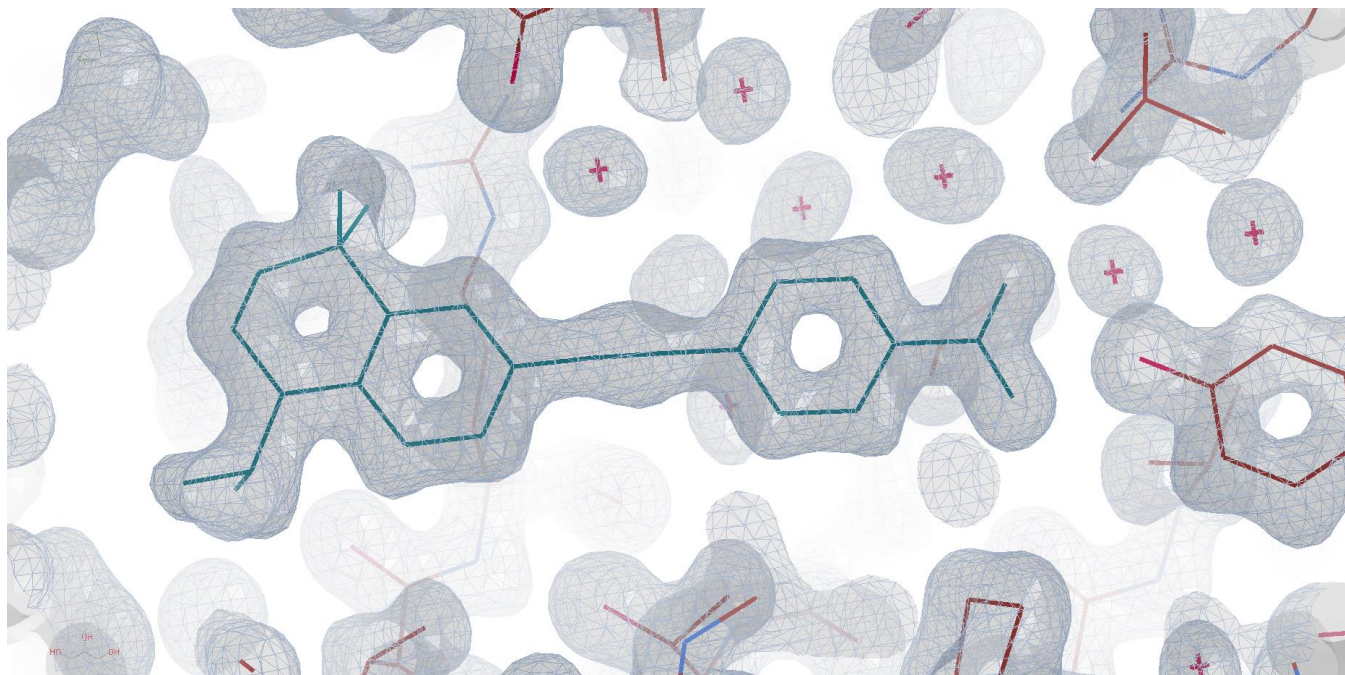

Figure 1: Unbiased electron density map ( $\sigma = 1$ ) of DC271 in the binding site of CRABP II at 1.5 Å resolution, R/R<sub>free</sub> 0.14/0.17. The binding triad ARG111 ARG132 TYR134 can be seen off to the right of the image.

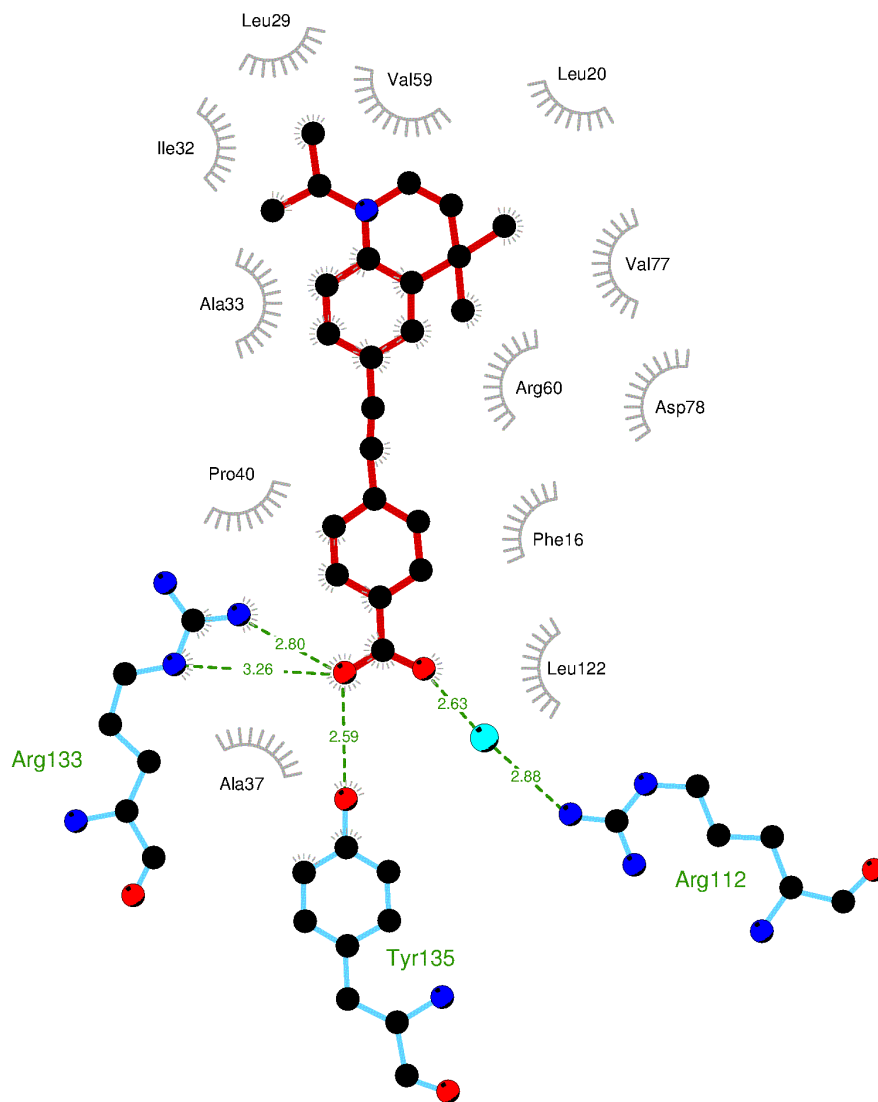

Figure 2: Ligplot<sup>10</sup> schematic of 6HKR binding site – clearly shown is the binding triad Arg112 Arg133 Tyr135 and the relevant hydrogen bonds to the ligand.

## REFERENCES

1. Broennimann, C.; Eikenberry, E.; Henrich, B.; Horisberger, R.; Huelsen, G.; Pohl, E.; Schmitt, B.; Schulze-Briese, C.; Suzuki, M.; Tomizaki, T., The PILATUS 1M detector. *J. Synchrotron Radiat.* **2006**, *13* (2), 120-130.
2. Kabsch, W., XDS. *Acta Crystallogr. Sect. D. Biol. Crystallogr.* **2010**, *66* (2), 125-132.
3. Winter, G., xia2: an expert system for macromolecular crystallography data reduction. *J. Appl. Crystallogr.* **2010**, *43* (1), 186-190.
4. Evans, P. R., An introduction to data reduction: space-group determination, scaling and intensity statistics. *Acta Crystallogr D Biol Crystallogr* **2011**, *67* (Pt 4), 282-92.
5. Evans, P. R.; Murshudov, G. N., How good are my data and what is the resolution? *Acta Crystallogr D Biol Crystallogr* **2013**, *69* (Pt 7), 1204-14.
6. Keegan, R. M.; Winn, M. D., Automated search-model discovery and preparation for structure solution by molecular replacement. *Acta Crystallogr. Sect. D. Biol. Crystallogr.* **2007**, *63* (4), 447-457.
7. McCoy, A. J.; Grosse-Kunstleve, R. W.; Adams, P. D.; Winn, M. D.; Storoni, L. C.; Read, R. J., Phaser crystallographic software. *J. Appl. Crystallogr.* **2007**, *40* (4), 658-674.
8. Emsley, P.; Lohkamp, B.; Scott, W. G.; Cowtan, K., Features and development of Coot. *Acta Crystallogr. Sect. D. Biol. Crystallogr.* **2010**, *66* (Pt 4), 486-501.
9. Murshudov, G. N.; Skubak, P.; Lebedev, A. A.; Pannu, N. S.; Steiner, R. A.; Nicholls, R. A.; Winn, M. D.; Long, F.; Vagin, A. A., REFMAC5 for the refinement of macromolecular crystal structures. *Acta Crystallogr. Sect. D. Biol. Crystallogr.* **2011**, *67* (Pt 4), 355-67.
10. Laskowski, R. A.; Swindells, M. B., LigPlot+: Multiple Ligand-Protein Interaction Diagrams for Drug Discovery. *J. Chem. Inf. Model.* **2011**, *51* (10), 2778-2786.
